## CONTENTS

|                                                                                                                                                                                                   |       |
|---------------------------------------------------------------------------------------------------------------------------------------------------------------------------------------------------|-------|
| <b>1. Approach for guideline development</b>                                                                                                                                                      | ii1   |
| <b>R. Vanholder</b>                                                                                                                                                                               |       |
| <b>2. EBPG guideline on dialysis strategies</b>                                                                                                                                                   | ii5   |
| <b>J. Tattersall, A. Martin-Malo, L. Pedrini, A. Basci, B. Canaud, D. Fouque, P. Haage, K. Konner, J. Kooman, F. Pizzarelli, J. Tordoir, M. Vennegoor, C. Wanner, P. ter Wee and R. Vanholder</b> |       |
| <b>3. EBPG guideline on haemodynamic instability</b>                                                                                                                                              | ii22  |
| <b>J. Kooman, A. Basci, F. Pizzarelli, B. Canaud, P. Haage, D. Fouque, K. Konner, A. Martin-Malo, L. Pedrini, J. Tattersall, J. Tordoir, M. Vennegoor, C. Wanner, P. ter Wee and R. Vanholder</b> |       |
| <b>4. EBPG Guideline on Nutrition</b>                                                                                                                                                             | ii45  |
| <b>D. Fouque, M. Vennegoor, P. ter Wee, C. Wanner, A. Basci, B. Canaud, P. Haage, K. Konner, J. Kooman, A. Martin-Malo, L. Pedrini, F. Pizzarelli, J. Tattersall, J. Tordoir and R. Vanholder</b> |       |
| <b>5. EBPG on Vascular Access</b>                                                                                                                                                                 | ii88  |
| <b>J. Tordoir, B. Canaud, P. Haage, K. Konner, A. Basci, D. Fouque, J. Kooman, A. Martin-Malo, L. Pedrini, F. Pizzarelli, J. Tattersall, M. Vennegoor, C. Wanner, P. ter Wee and R. Vanholder</b> |       |
| <b>6. CV's of the EBPG members</b>                                                                                                                                                                | ii118 |

The present guidelines are based upon the information available to the guideline work groups at the moment of their publication. They are designed to provide information and assist decision making, but are not intended to define a standard of care or to impose an exclusive course of treatment. Individual therapeutic decision making is essential in the treatment of any disease and thus also in chronic kidney disease.

Variations in practice are inevitable when physicians take into account individual patient needs, available resources, and limitations specific for a geographic area, country, institution or type of practice. In addition, evidence may change over time as new information becomes available, so that practice may be modified subsequently. Every practitioner using these guidelines is responsible for their application to any particular clinical situation. The commissioners involved in the development of these guidelines have disclosed all actual and potential conflicts of interest that may arise as a result of an outside relationship or a personal, professional, or business interest.
